# Supplementary material for: Global characterization of copy number variants in epilepsy patients from whole genome sequencing
Source: PLOS journal article supplement (doi:10.1371/journal.pgen.1007285), 2018-04-12

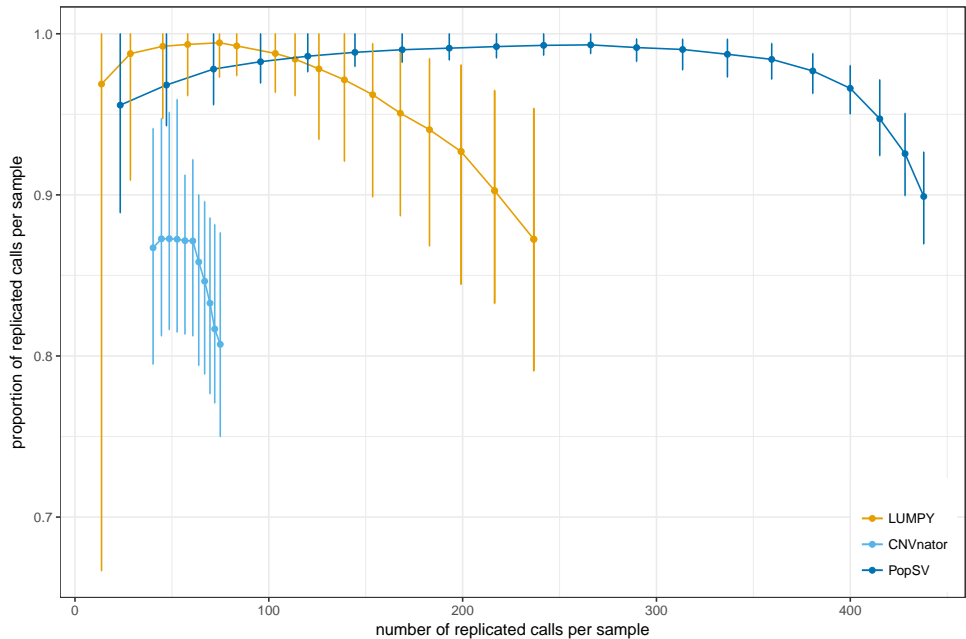

Supplement: S10 (10.1371/journal.pgen.1007285.s010) [file journal.pgen.1007285.s010]
